# Supplementary material
Source: PubMed Central journal article supplement (PMC6349045)
Supplement: NIHMS1510321-supplement-Supp_Tables_1_-_2.pdf [file NIHMS1510321-supplement-Supp_Tables_1_-_2.pdf]

Supplementary Table 1: Top 100 hits from Genome-wide CRISPR Screen

| <b>gene</b> | <b>rank</b> | <b>effect_size</b> | <b>#_active_guide-RNA</b> |
|-------------|-------------|--------------------|---------------------------|
| ZNF638      | 1           | 2.63205            | 4                         |
| FAM208A     | 2           | 2.24327            | 4                         |
| PPHLN1      | 3           | 2.13391            | 4                         |
| MPHOSPH8    | 4           | 2.08711            | 4                         |
| GGT1        | 5           | 1.10441            | 4                         |
| SETDB1      | 6           | 2.21309            | 3                         |
| CISD2       | 7           | 1.72321            | 3                         |
| ZNT1        | 8           | 0.959286           | 4                         |
| DUOXA2      | 9           | 1.23413            | 3                         |
| TESC        | 10          | 1.2392             | 3                         |
| KLHDC3      | 11          | 1.36548            | 3                         |
| MEGF6       | 12          | 0.967221           | 4                         |
| PDS5A       | 13          | 1.32098            | 3                         |
| NTN1        | 14          | 0.98269            | 4                         |
| RMDN1       | 15          | 0.977388           | 4                         |
| GP5         | 16          | 1.15447            | 3                         |
| OR6B3       | 17          | 1.15165            | 3                         |
| TP53TG3     | 18          | 0.911801           | 4                         |
| PHF8        | 19          | 1.23008            | 3                         |
| NARS        | 20          | 1.16104            | 3                         |
| TRIM64      | 21          | 1.12279            | 3                         |
| TTC1        | 22          | 0.902693           | 4                         |
| OR10W1      | 23          | 1.18528            | 3                         |
| UBE2Q1      | 24          | 0.906118           | 4                         |
| FBXL21      | 25          | 1.01763            | 4                         |
| FIBP        | 26          | 1.08841            | 3                         |
| PALD1       | 27          | 1.62218            | 3                         |
| TMEM231     | 28          | 1.31684            | 3                         |
| FAM57B      | 29          | 1.0858             | 3                         |
| C10orf128   | 30          | 0.87654            | 4                         |
| ZNF417      | 31          | 0.899485           | 4                         |
| SPCS3       | 32          | 1.07123            | 3                         |
| CCDC97      | 33          | 1.04027            | 3                         |
| KATNA1      | 34          | 1.12978            | 3                         |
| PRSS42      | 35          | 1.07842            | 3                         |
| COL17A1     | 36          | 0.943756           | 4                         |
| MICALL1     | 37          | 1.01294            | 3                         |
| EIF3A       | 38          | 0.999239           | 3                         |
| TRPC4       | 39          | 1.02819            | 3                         |
| MED30       | 40          | 1.10368            | 3                         |
| HLA-C       | 41          | 0.999188           | 3                         |
| ASB7        | 42          | 0.906047           | 4                         |
| ROMO1       | 43          | 1.01502            | 3                         |
| NHLRC1      | 44          | 0.904565           | 4                         |
| GALNT2      | 45          | 0.819983           | 4                         |
| H2AFB2      | 46          | 0.888488           | 4                         |
| RNF225      | 47          | 1.05506            | 3                         |
| CRK         | 48          | 1.22403            | 3                         |
| PKD1        | 49          | 0.843695           | 4                         |
| BEST3       | 50          | 0.80587            | 4                         |
| PHC2        | 51          | 0.986973           | 3                         |

|          |     |          |   |
|----------|-----|----------|---|
| KCNA7    | 52  | 1.37561  | 3 |
| PLEKHG6  | 53  | 2.35719  | 2 |
| NPIPA7   | 54  | 0.972726 | 3 |
| SORD     | 55  | 0.960852 | 3 |
| SPG20    | 56  | 0.855874 | 4 |
| ATP6V1E2 | 57  | 0.982888 | 3 |
| FLG      | 58  | 0.998215 | 3 |
| ABT1     | 59  | 0.955187 | 3 |
| RNF7     | 60  | 0.94169  | 4 |
| MXI1     | 61  | 0.817274 | 4 |
| NRAP     | 62  | 0.992491 | 4 |
| KANSL1   | 63  | 1.00645  | 3 |
| ATAD3B   | 64  | 1.02011  | 3 |
| C1QTNF8  | 65  | 0.944534 | 3 |
| LAMP3    | 66  | 0.789645 | 4 |
| HDLBP    | 67  | 1.0039   | 3 |
| RPL19    | 68  | 0.940305 | 3 |
| HYAL2    | 69  | 1.73656  | 2 |
| SLC6A5   | 70  | 0.820064 | 4 |
| RANBP3   | 71  | 1.04526  | 3 |
| OPRD1    | 72  | 0.800522 | 4 |
| FOXD2    | 73  | 0.963396 | 3 |
| PROX1    | 74  | 1.13765  | 3 |
| CTF1     | 75  | 1.02116  | 3 |
| PDGFD    | 76  | 1.01201  | 3 |
| SLC25A28 | 77  | 1.61938  | 2 |
| CRISP2   | 78  | 0.887361 | 4 |
| F8A3     | 79  | 1.57944  | 2 |
| MORN2    | 80  | 0.972209 | 3 |
| CDK6     | 81  | 1.04648  | 3 |
| PHB2     | 82  | 1.53832  | 2 |
| ARFGAP1  | 83  | 1.21555  | 3 |
| PTPRJ    | 84  | 0.923228 | 3 |
| BEX5     | 85  | 1.52177  | 2 |
| MORC2    | 86  | 0.884634 | 4 |
| OSBPL8   | 87  | 0.931885 | 3 |
| LTV1     | 88  | 0.833536 | 4 |
| ATP5G3   | 89  | 1.00704  | 3 |
| GPR50    | 90  | 0.988444 | 3 |
| GLIPR1L1 | 91  | 1.478    | 2 |
| HMGCS1   | 92  | 1.47568  | 2 |
| SNCG     | 93  | 1.46522  | 2 |
| DCP1A    | 94  | 1.4201   | 2 |
| UBQLN1   | 95  | 0.947571 | 3 |
| GPR84    | 96  | 1.40183  | 2 |
| LOXHD1   | 97  | 1.39804  | 2 |
| KLK4     | 98  | 1.34999  | 3 |
| FAM174B  | 99  | 1.41027  | 2 |
| LRRC36   | 100 | 0.904245 | 3 |

Supplementary Table 2: qPCR primers

**qPCR primers**

|                   | <b>Forward Primer</b>    | <b>Reverse Primer</b>    |
|-------------------|--------------------------|--------------------------|
| <b>MLV LTR</b>    | AGGGTCTCCTCTGAGTGATTGACT | TCGGACAGACACAGATAAGTTGCT |
| <b>MLV 2LTR</b>   | AGGGTCTCCTCTGAGTGATT     | ATGGTGTGTGGAGGAGTATAAAG  |
| <b>MYT1</b>       | AGGCACCTTCTGTTGGCCGA     | AGGCAGCTGCCTCC GTACA     |
| <b>betaGlobin</b> | CAGAGCCATCTATTGCTTAC     | GCCTCACCACCAACTTCATC     |
| <b>GAPDH</b>      | CAATTCCCATCTCAGTCGT      | TAGTAGCCGGGCCCACTTT      |
| <b>SETDB1</b>     | AGGAACTTCGGCATTTCATCG    | TGTCCCGGTATTGTAGTCCCA    |
| <b>SETDB2</b>     | TGCTCTGGTGCTTGTCTGATG    | TGCATGTCGTCTTTGGAAGTG    |
| <b>SUV39H1</b>    | CCTGCCCTCGGTATCTCTAAG    | ATATCCACGCCATTTACCAG     |
| <b>SUV39H2</b>    | TCTATGACAACAAGGGAATCACG  | GAGACACATTGCCGTATCGAG    |
| <b>EHMT1</b>      | GCTGTGTGAAAACCGAGCTG     | TCCGCTATCCGAGTTAGTGTG    |
| <b>EHMT2</b>      | GGGCGGGAATCACCTCC        | CACTCATGCGGAAATGCTGTAT   |
| <b>EZH2</b>       | AATCAGAGTACATGCGACTGAGA  | GCTGTATCCTTCGCTGTTTCC    |
