# Supplementary material
Source: PubMed Central journal article supplement (PMC6349045)
Supplement: NIHMS1510321-supplement-Supplementary_Figure.pdf [file NIHMS1510321-supplement-Supplementary_Figure.pdf]

**Fig. 2b**

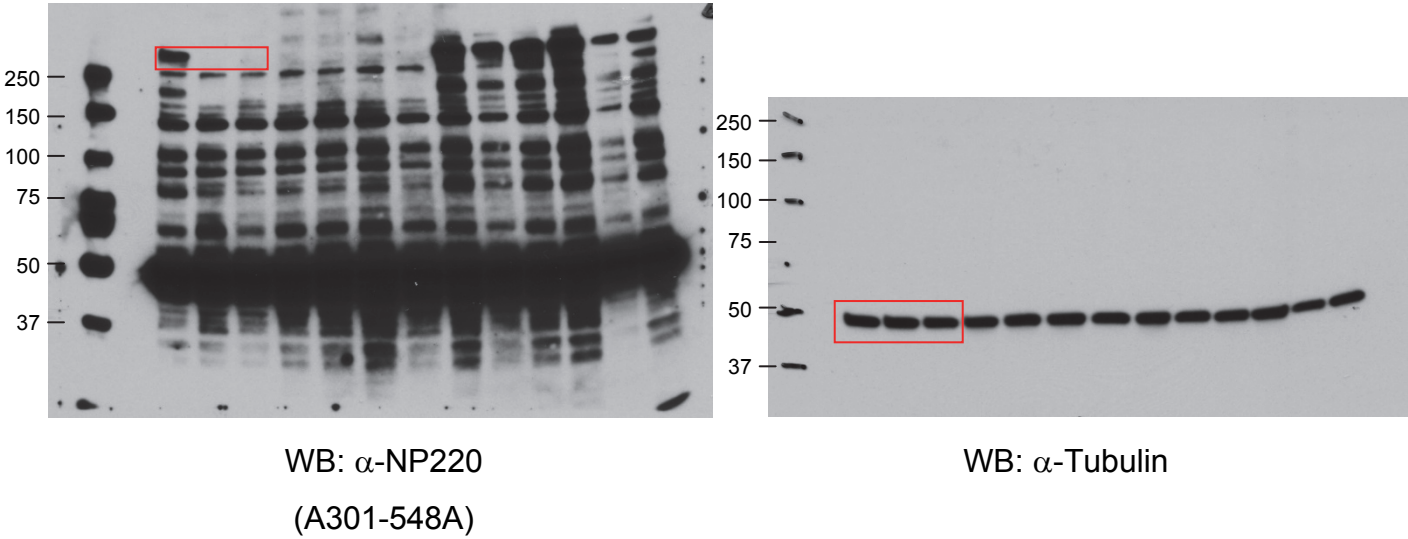

**Fig. 2c**

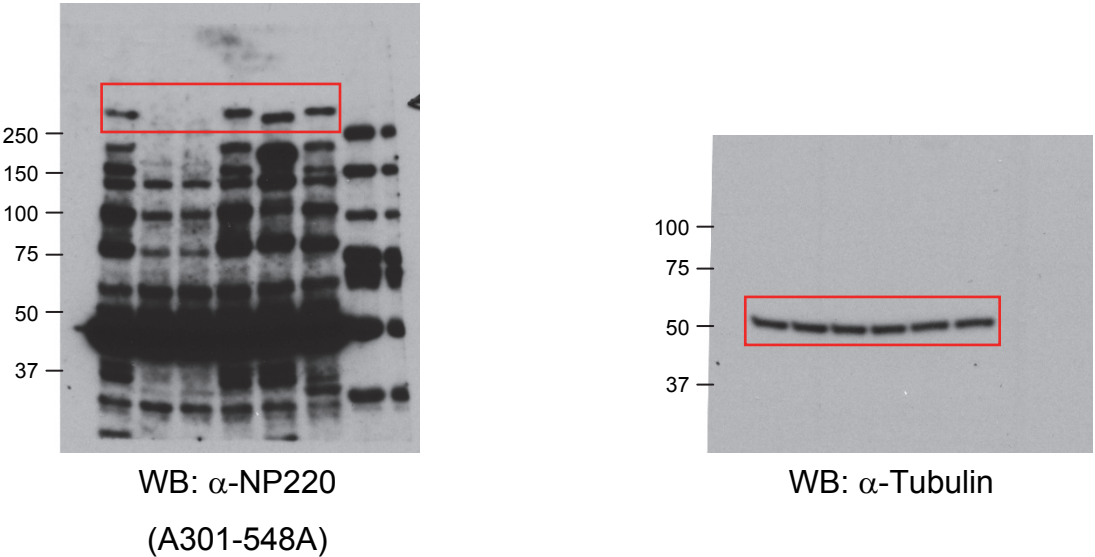

**Fig. 2d**

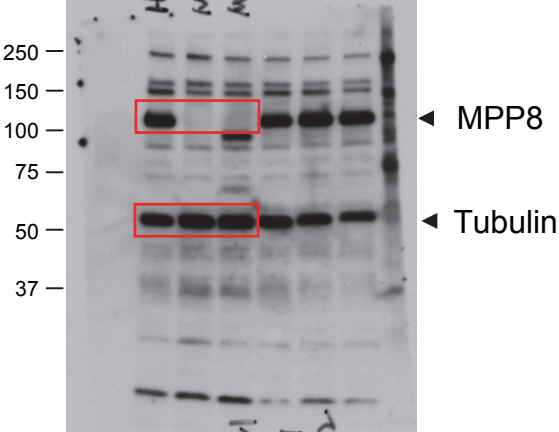

WB:  $\alpha$ -MPP8  
 $\alpha$ -Tubulin

**Fig. 2e**

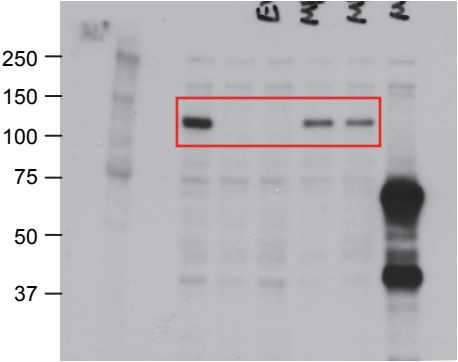

WB:  $\alpha$ -MPP8

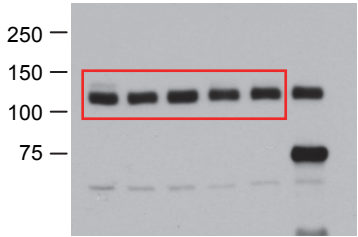

WB:  $\alpha$ -LARS

**Fig. 2f**

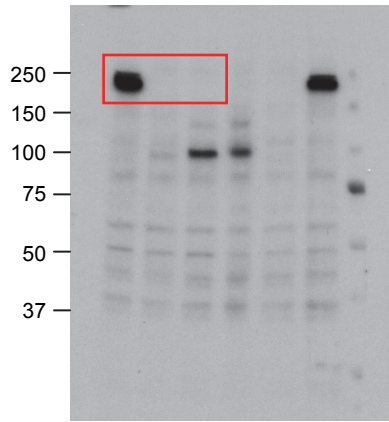

WB:  $\alpha$ -TASOR

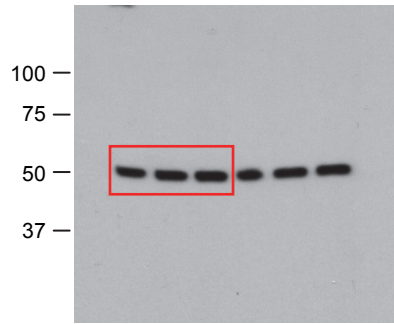

WB:  $\alpha$ -Tubulin

**Fig. 2g**

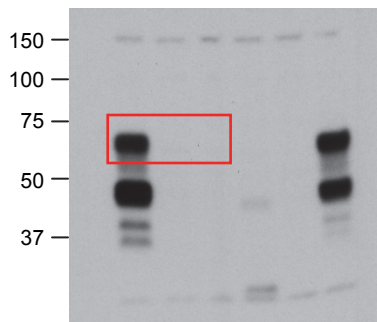

WB:  $\alpha$ -PPhLN1

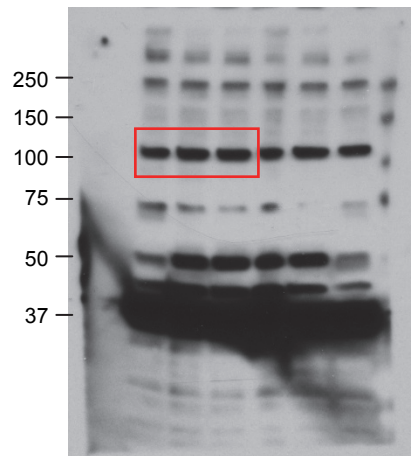

WB:  $\alpha$ -LARS

**Fig. 2h**

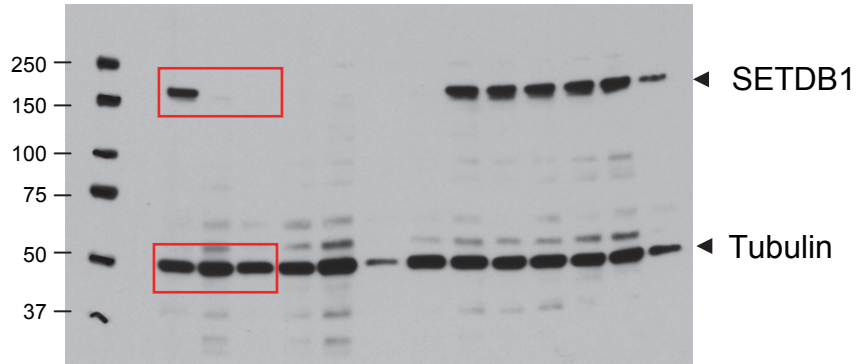

WB:  $\alpha$ -SETDB1  
 $\alpha$ -Tubulin

**Extended Data Fig. 2a**

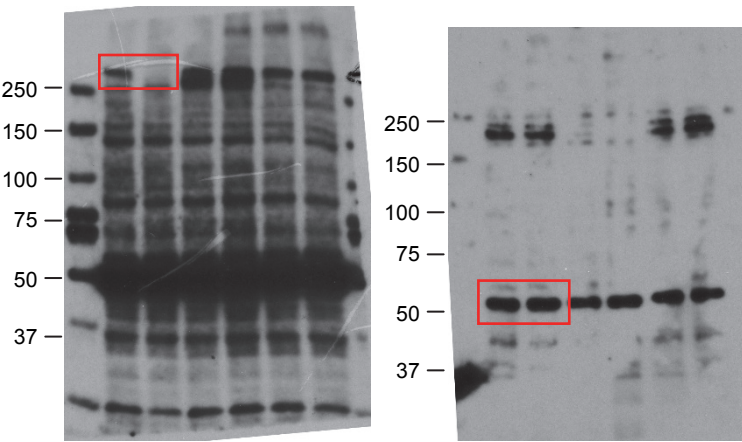

WB:  $\alpha$ -NP220  
(A301-548A)

WB:  $\alpha$ -Tubulin

**Extended Data Fig. 2b**

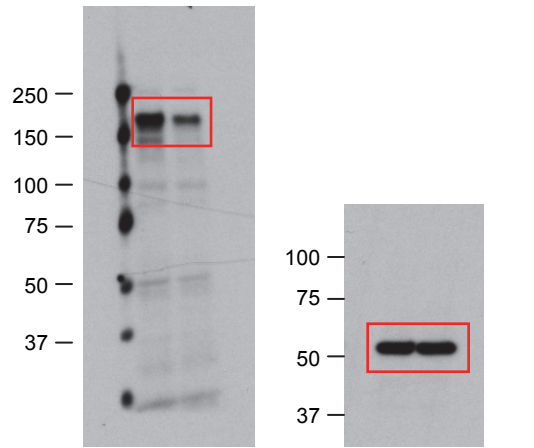

WB:  $\alpha$ -NP220  
(A301-547A)

WB:  $\alpha$ -Tubulin

**Fig. 3a**

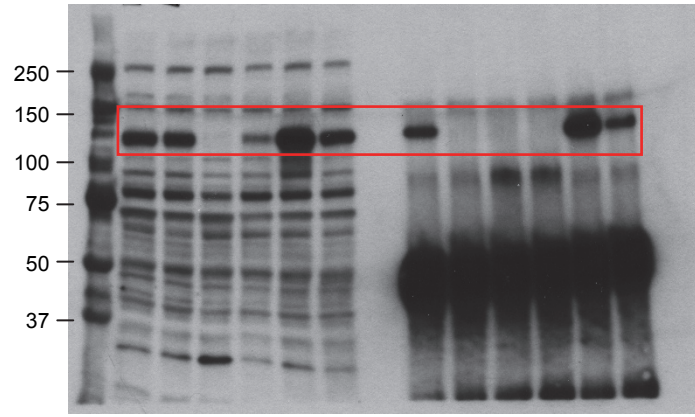

WB:  $\alpha$ -MPP8

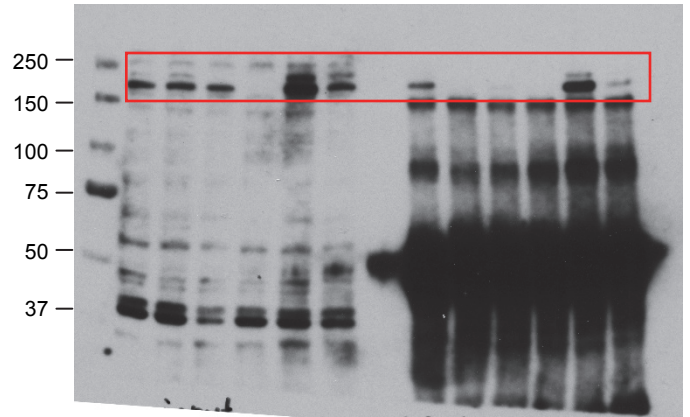

WB:  $\alpha$ -TASOR

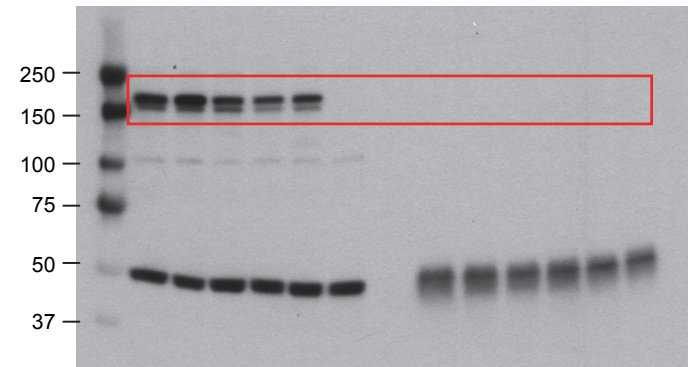

WB:  $\alpha$ -SETDB1

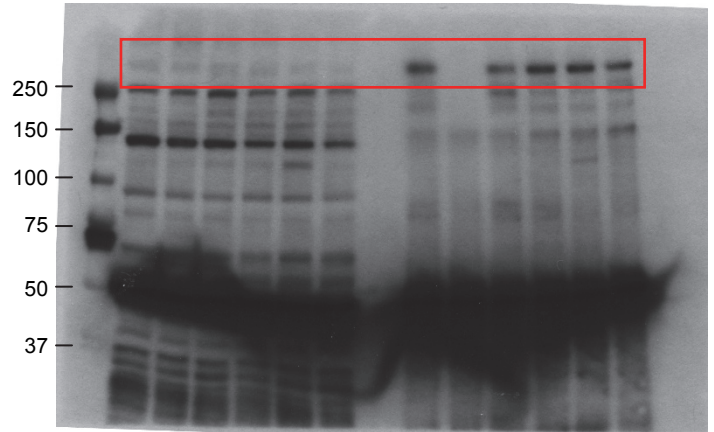

WB:  $\alpha$ -NP220  
(A301-547A)

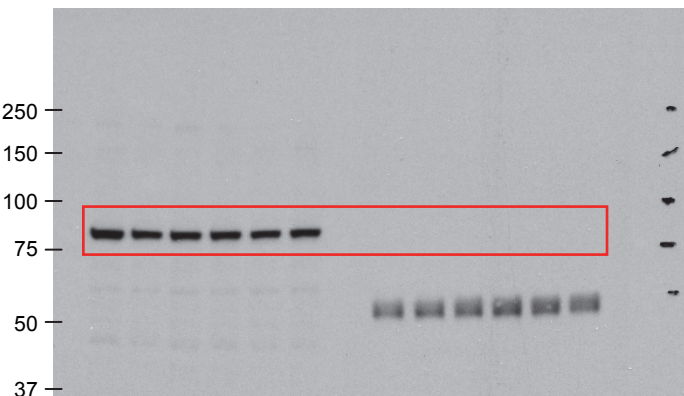

WB:  $\alpha$ -QARS



### Extended Data Fig. 3a

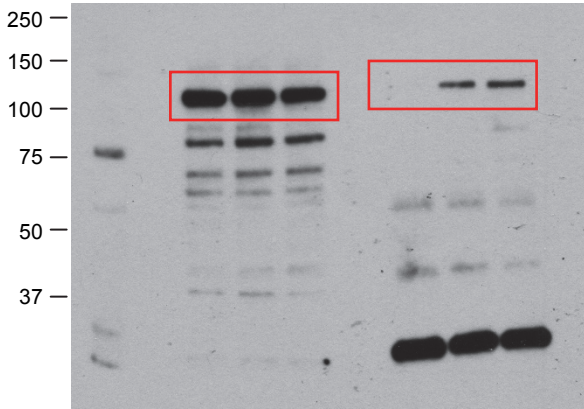

WB:  $\alpha$ -MPP8

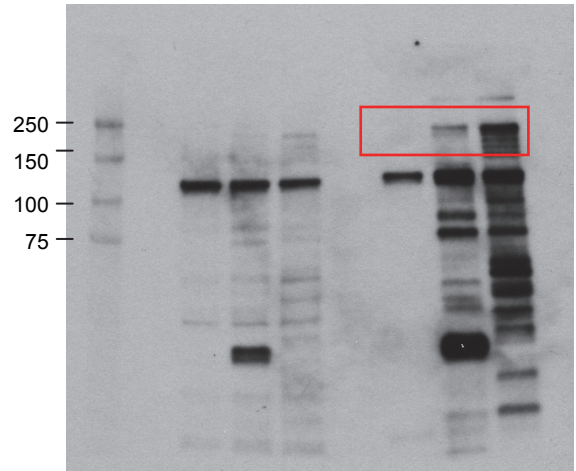

WB:  $\alpha$ -HA

### Extended Data Fig. 3b

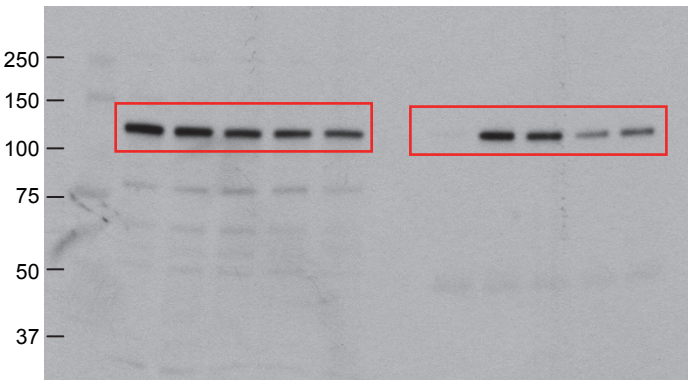

WB:  $\alpha$ -MPP8

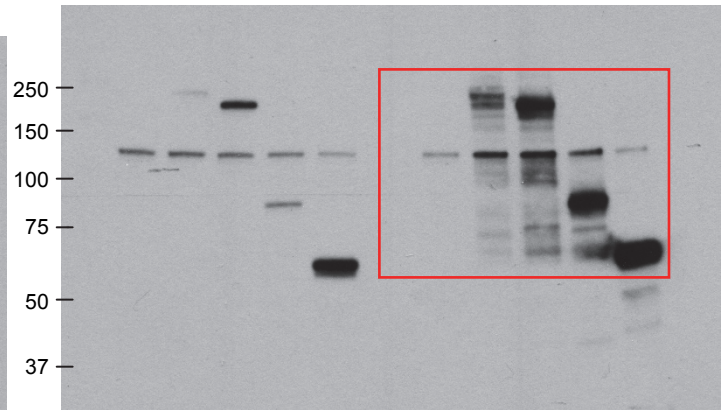

WB:  $\alpha$ -HA

**Fig. 4b**

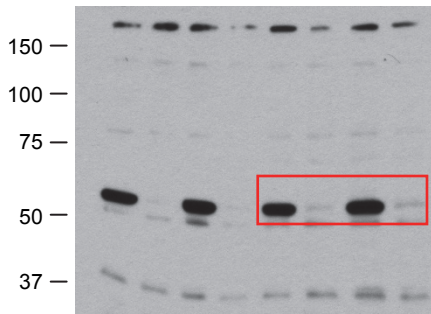

WB:  $\alpha$ -HDAC1

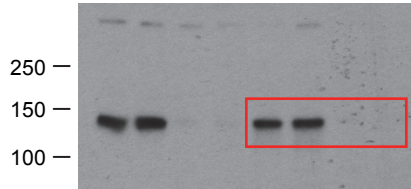

WB:  $\alpha$ -HDAC4

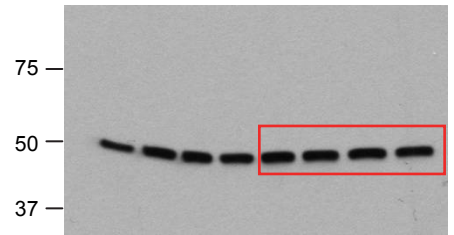

WB:  $\alpha$ -Tubulin

**Fig. 4d**

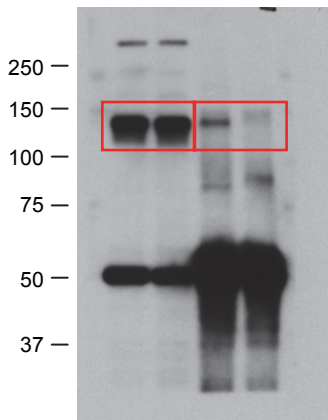

WB:  $\alpha$ -HDAC4

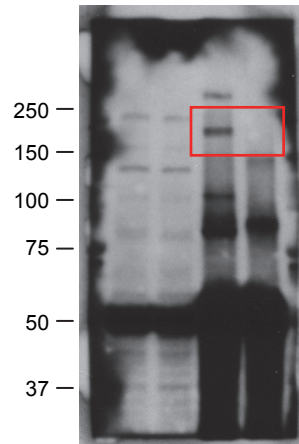

WB:  $\alpha$ -NP220  
(A301-547A)

**Fig. 4e**

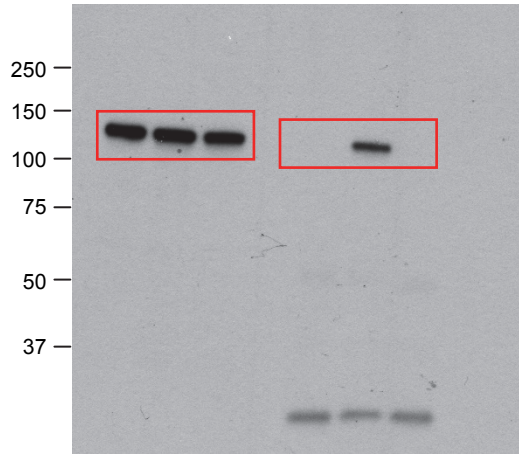

WB:  $\alpha$ -HDAC4

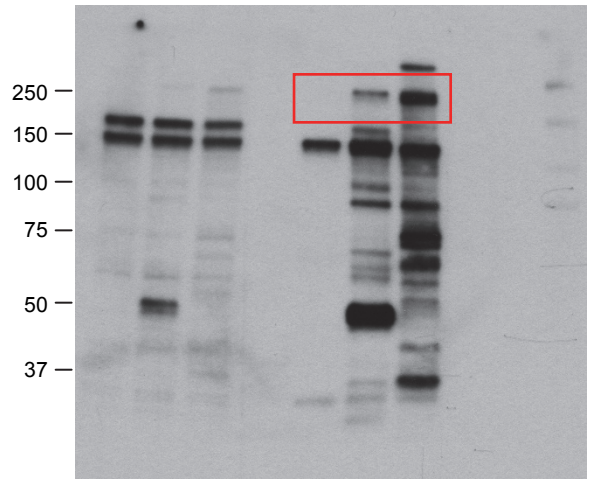

WB:  $\alpha$ -HA



# Extended Data Fig. 4a

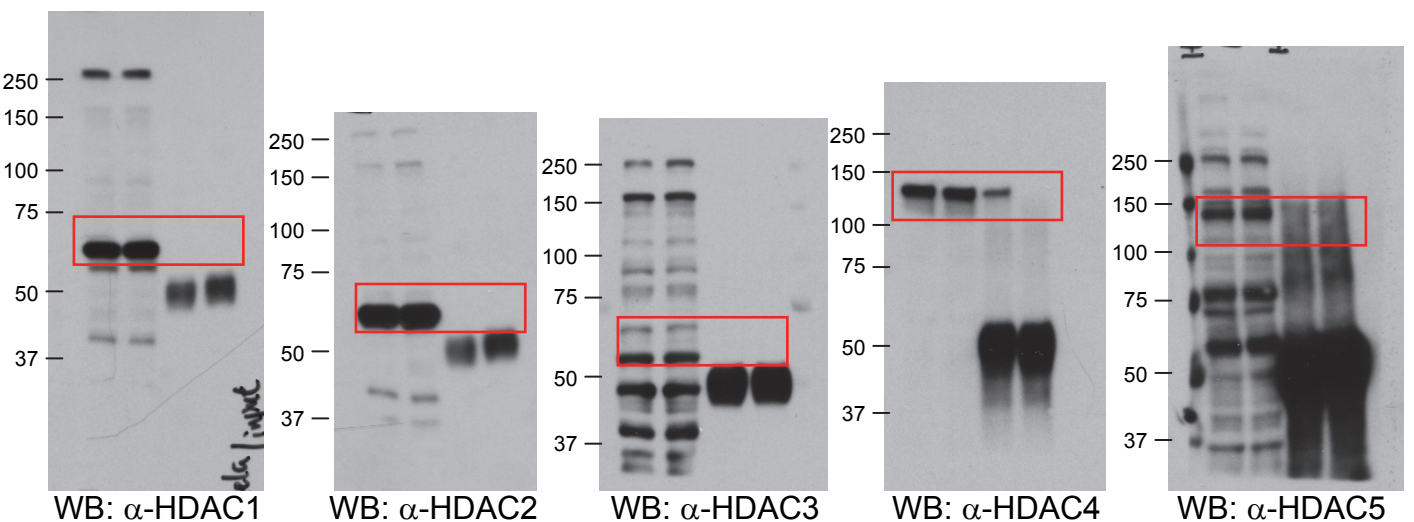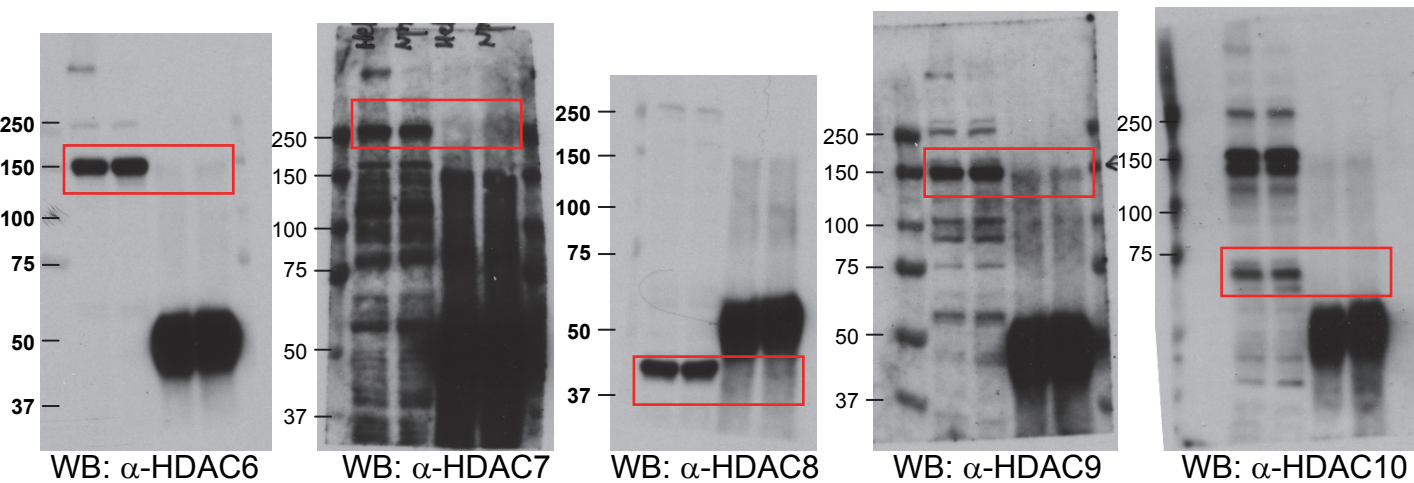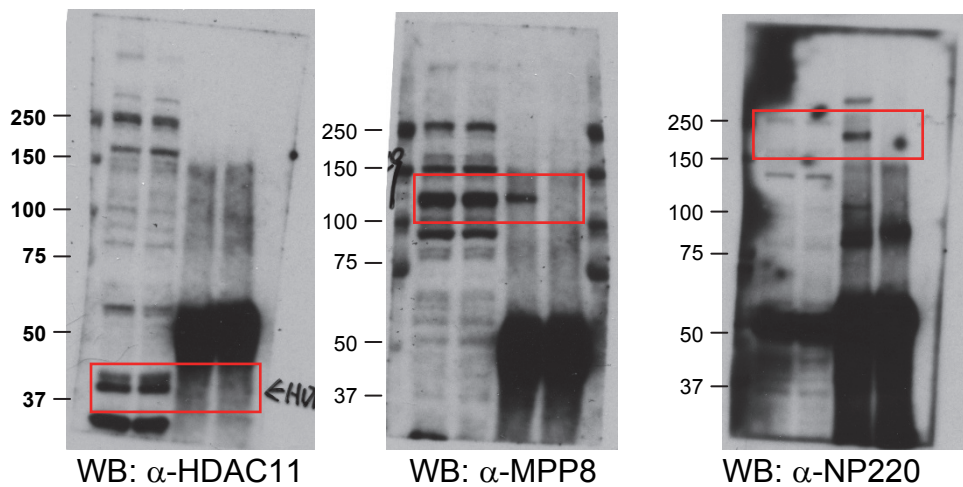

(A301-547A)

# Extended Data Fig. 4b

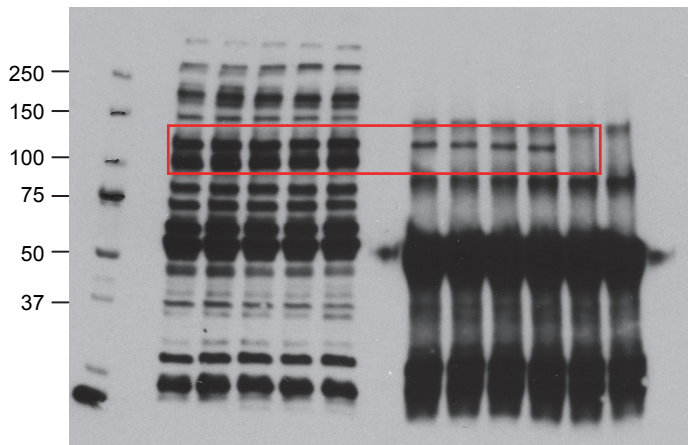

WB:  $\alpha$ -MPP8

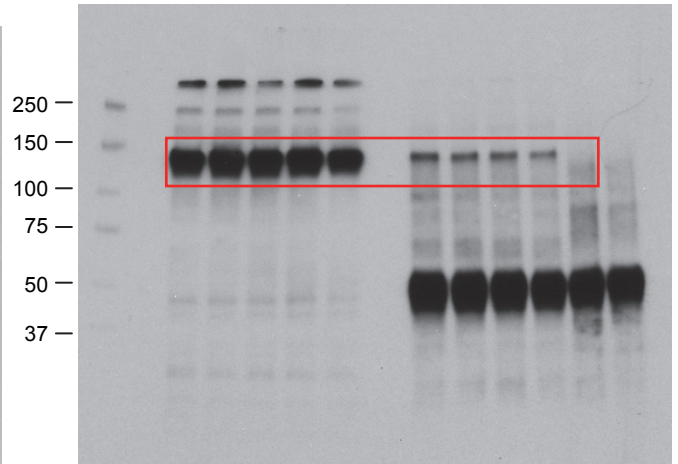

WB:  $\alpha$ -HDAC4

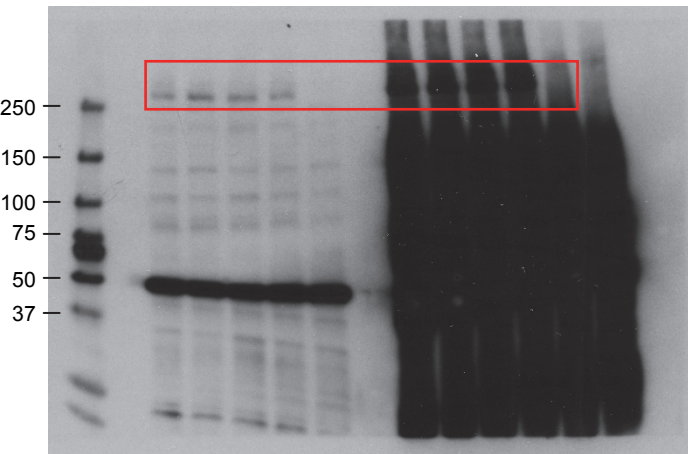

WB:  $\alpha$ -NP220  
(A301-548A)

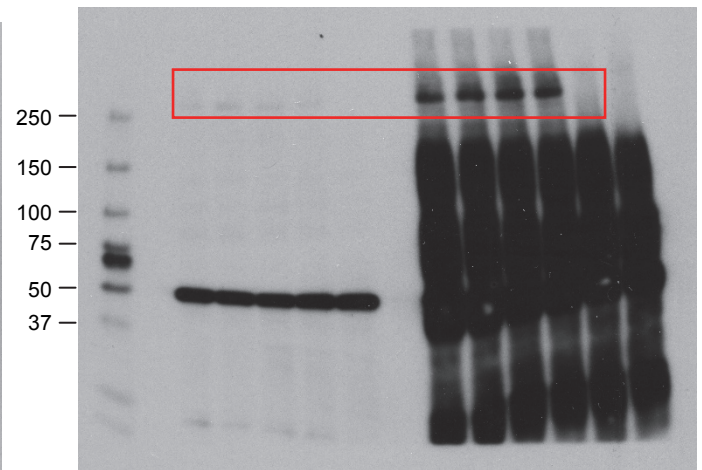

WB:  $\alpha$ -NP220  
(A301-548A)  
(short time exposure)

## Extended Data Fig. 5a

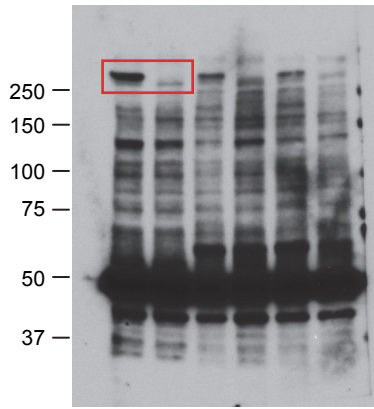

WB:  $\alpha$ -NP220  
(A301-548A)

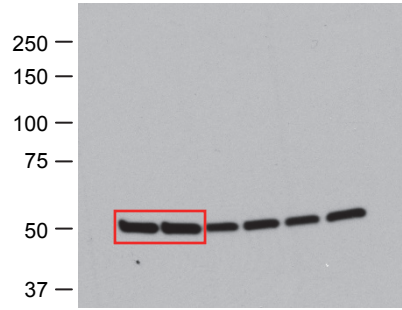

WB:  $\alpha$ -Tubulin

## Extended Data Fig. 5b

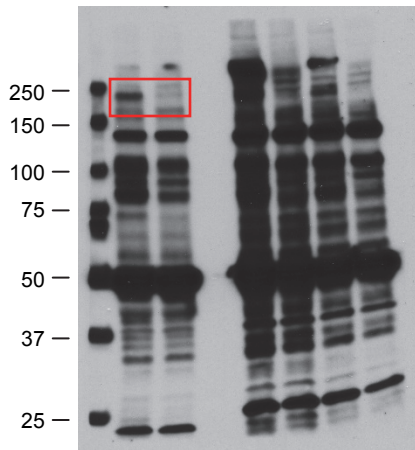

WB:  $\alpha$ -NP220  
(A301-548A)

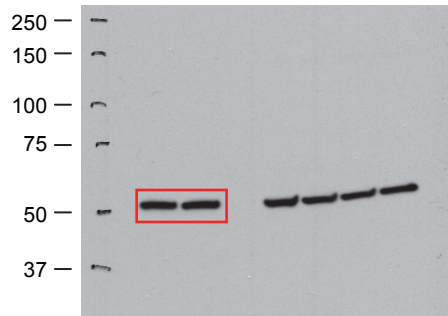

WB:  $\alpha$ -Tubulin

Fig. 5b

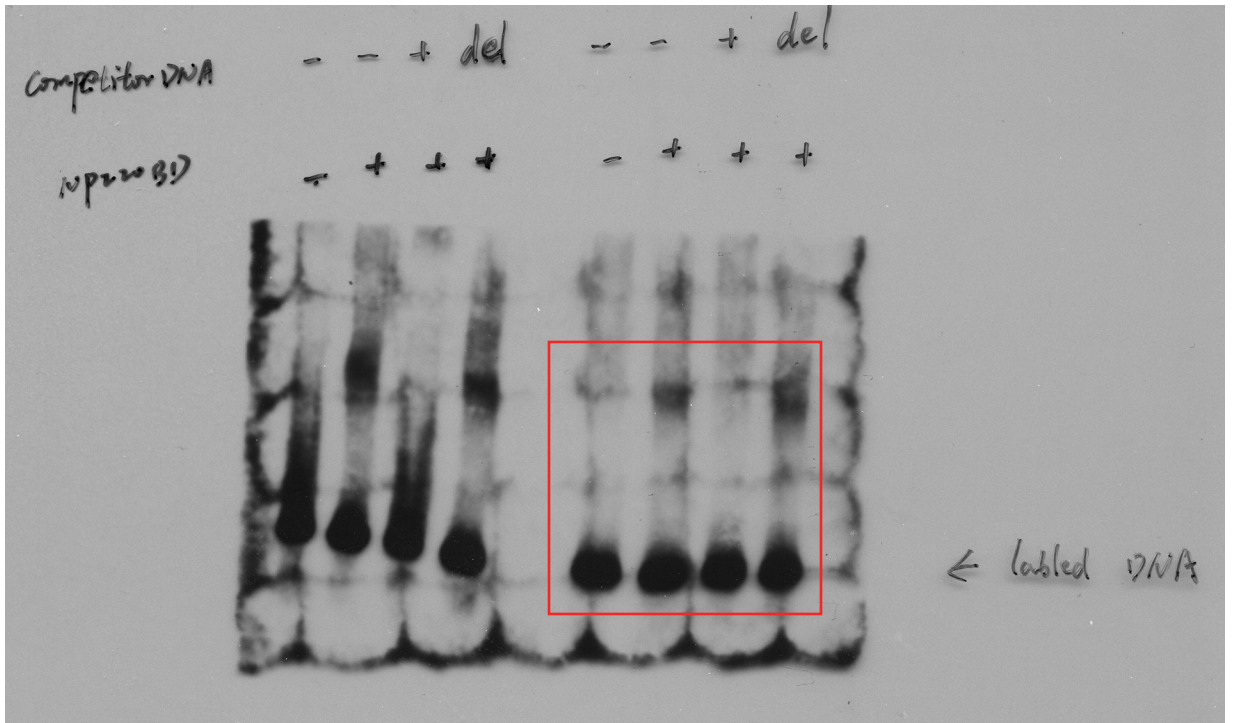



**Fig. 5g**

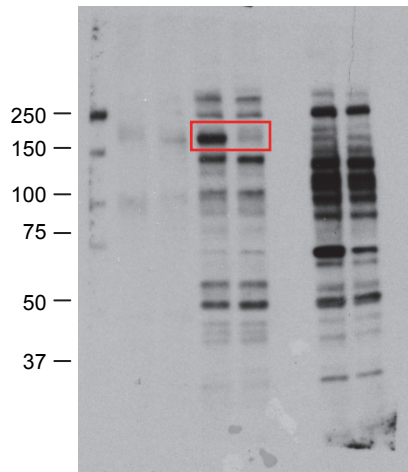

WB:  $\alpha$ -NP220  
(A301-547A)

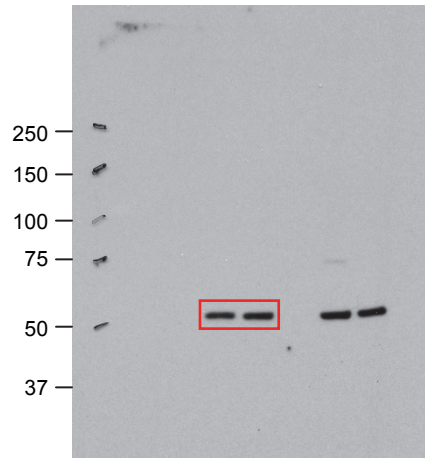

WB:  $\alpha$ -Tubulin
